# Supplementary material for: Immunochemical measurement of urinary free light chains and Bence Jones proteinuria
Source: publisher site journal article supplement (doi:10.1515/cclm-2025-0265), 2025-05-30

**Figure S1.** ROC curves of urinary parameters vs UIFE results for detecting BJP-K (A) and BJP-λ (B). The analysis includes urinary free light chains (uFLC) along with their respective kappa (K) and lambda (λ) ratios. The area under the curve (AUC) values are reported for each marker. SE, sensibility; SP, specificity; PPV, positive predictive value; NPV, negative predictive value (C).


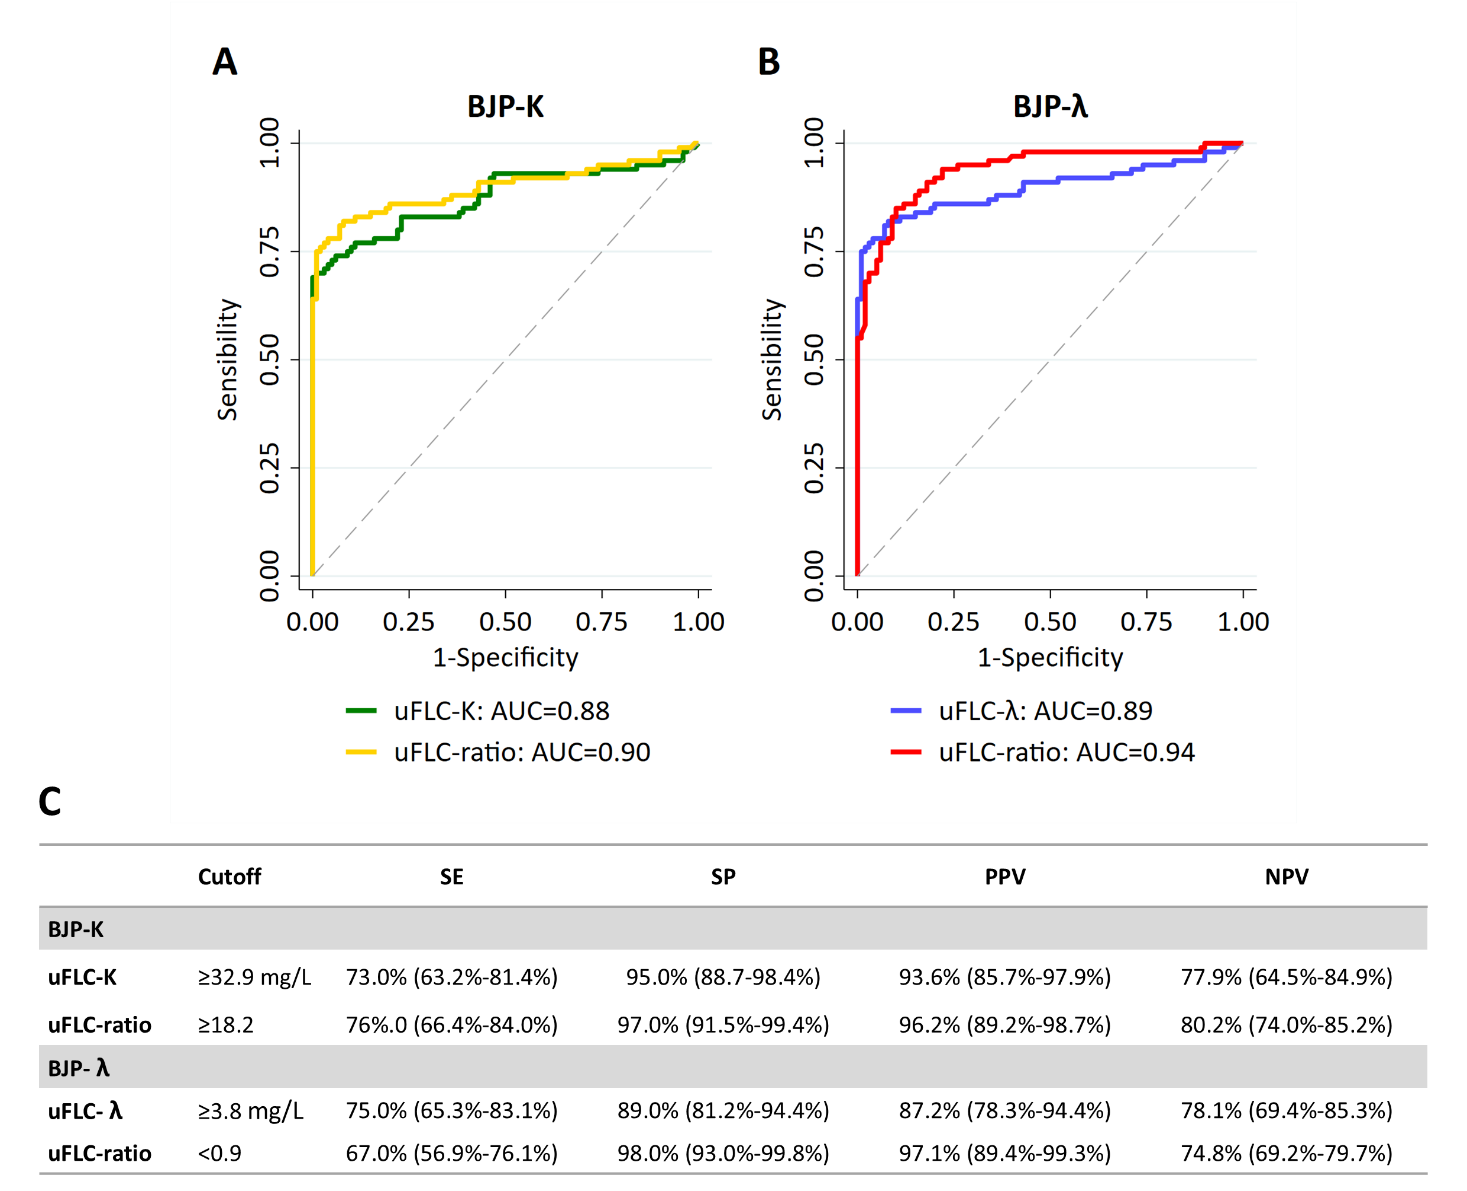

Supplement: Supplementary file 1 [file j_cclm-2025-0265_suppl_001.docx]
